# Supplementary material for: Falls Predict Acute Hospitalization in Parkinson’s Disease
Source: PubMed Central journal article supplement — J Parkinsons Dis. 2023 Jan 31;13(1):105–24. doi: 10.3233/JPD-212539 (PMC9912731; doi:10.3233/jpd-212539), 2023-01-31
Supplement: jpd-13-jpd212539-s001.pdf [file jpd-13-jpd212539-s001.pdf]

# Supplementary Material

## Falls Predict Acute Hospitalization in Parkinson's Disease

**Supplementary Figure 1.** Frequency of hospital admissions during the 1-year follow-up in patients regarding having falls or not on the month before the baseline visit (p=0.005).

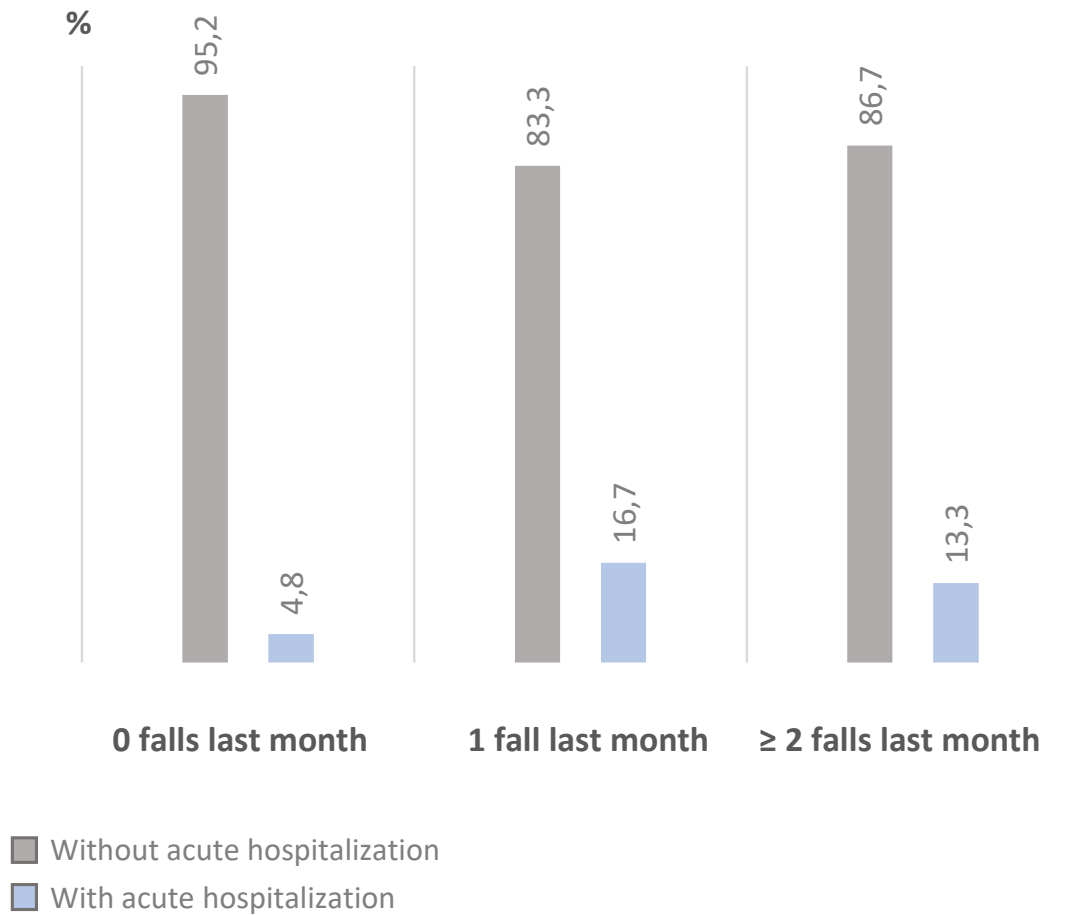

**Supplementary Table 1.** Factor included in the model as potential predictors of acute hospitalization.

|                                                                                                                                                                                                                                                                                                                                                                                                                                                                                                                                                                                                                                                                                                                                                                                                                                                                                                                                                                                                                                                                                                                                                                                                                                                                                                                                                                                                                                                                                                                                                                                                                                                                                                                                                                                                                                                                                                                                                                                                                                                                                                                                                               |                                                                                                                                                                                                                                                                                                                                                                                                                                                                                                                                                                                                                                                                                                                                                                                                                                                                        |
|---------------------------------------------------------------------------------------------------------------------------------------------------------------------------------------------------------------------------------------------------------------------------------------------------------------------------------------------------------------------------------------------------------------------------------------------------------------------------------------------------------------------------------------------------------------------------------------------------------------------------------------------------------------------------------------------------------------------------------------------------------------------------------------------------------------------------------------------------------------------------------------------------------------------------------------------------------------------------------------------------------------------------------------------------------------------------------------------------------------------------------------------------------------------------------------------------------------------------------------------------------------------------------------------------------------------------------------------------------------------------------------------------------------------------------------------------------------------------------------------------------------------------------------------------------------------------------------------------------------------------------------------------------------------------------------------------------------------------------------------------------------------------------------------------------------------------------------------------------------------------------------------------------------------------------------------------------------------------------------------------------------------------------------------------------------------------------------------------------------------------------------------------------------|------------------------------------------------------------------------------------------------------------------------------------------------------------------------------------------------------------------------------------------------------------------------------------------------------------------------------------------------------------------------------------------------------------------------------------------------------------------------------------------------------------------------------------------------------------------------------------------------------------------------------------------------------------------------------------------------------------------------------------------------------------------------------------------------------------------------------------------------------------------------|
| <p><b>Principal Potential predictors of acute hospitalization</b></p> <p><b>UPDRS-III-OFF.</b> The hypothesis was that a higher UPDRS-III score indicating a worse motor status increases the risk of acute hospitalization. Specifically, a UPDRS-III score &gt; 20 indicating moderate or severe motor affectation, was considered.</p> <p><b>UPDRS-IV.</b> The hypothesis was that a higher UPDRS-IV score indicating more severe motor complications increases the risk of acute hospitalization. Specifically, motor complications and dyskinesia regarding the UPDRS-IV item-42 and UPDRS-IV item-35, respectively, were considered.</p> <p><b>NMSS.</b> The hypothesis was that a higher NMSS total score indicating a greater NMS burden increases the risk of acute hospitalization. Specifically, severe (NMSS total score &gt; 41-70) and very severe NMS burden (NMSS total score &gt; 70) were considered [18].</p> <p><b>BDI-II.</b> The hypothesis was that a higher BDI-II total score indicating a worse mood increases the risk of acute hospitalization. Specifically, major depression regarding the DSM-IV criteria [16], was considered.</p> <p><b>PD-CRS.</b> The hypothesis was that a lower PD-CRS total score indicating a worse cognitive function increases the risk of acute hospitalization. Specifically, a score ≤ 84 indicating cognitive impairment [19], was considered.</p> <p><b>NPI.</b> The hypothesis was that a higher NPI score indicating more severe neuropsychiatric symptoms increases the risk of acute hospitalization.</p> <p><b>Falls.</b> The hypothesis was that having falls increases the risk of acute hospitalization due to the risk of complications (fractures, etc.).</p> <p><b>Dysphagia.</b> The hypothesis was that having dysphagia increases the risk of acute hospitalization due to the risk of complications (bronchoaspiration, etc.).</p> <p><b>ADLS.</b> The hypothesis was that a lower ADLS indicating a greater disability increases the risk of acute hospitalization due to the risk of complications (falls, etc.). Specifically, functional dependency [21] was considered.</p> | <p><b>Covariates included in the model for adjustment</b></p> <p><b>Age.</b> The hypothesis was that older age increases the risk of acute hospitalization.</p> <p><b>Gender</b></p> <p><b>Disease duration.</b> The hypothesis is that longer disease duration increases the risk of acute hospitalization due to a more clinical affectation with more complications.</p> <p><b>LEDD [22].</b> The hypothesis is that higher LEDD increases the risk of acute hospitalization due to a more clinical affectation with more complications and longer disease duration.</p> <p><b>Total number of non-antiparkinsonian drugs.</b> It was considered as a marker of comorbidity [23]. The hypothesis was that a higher number of non-antiparkinsonian drugs increases the risk of acute hospitalization due to a more clinical affectation with more complications.</p> |
|---------------------------------------------------------------------------------------------------------------------------------------------------------------------------------------------------------------------------------------------------------------------------------------------------------------------------------------------------------------------------------------------------------------------------------------------------------------------------------------------------------------------------------------------------------------------------------------------------------------------------------------------------------------------------------------------------------------------------------------------------------------------------------------------------------------------------------------------------------------------------------------------------------------------------------------------------------------------------------------------------------------------------------------------------------------------------------------------------------------------------------------------------------------------------------------------------------------------------------------------------------------------------------------------------------------------------------------------------------------------------------------------------------------------------------------------------------------------------------------------------------------------------------------------------------------------------------------------------------------------------------------------------------------------------------------------------------------------------------------------------------------------------------------------------------------------------------------------------------------------------------------------------------------------------------------------------------------------------------------------------------------------------------------------------------------------------------------------------------------------------------------------------------------|------------------------------------------------------------------------------------------------------------------------------------------------------------------------------------------------------------------------------------------------------------------------------------------------------------------------------------------------------------------------------------------------------------------------------------------------------------------------------------------------------------------------------------------------------------------------------------------------------------------------------------------------------------------------------------------------------------------------------------------------------------------------------------------------------------------------------------------------------------------------|

ADLS, Activities of Daily Living Scale; BDI-II, Beck Depression Inventory II; LEED, Levodopa equivalent daily dose; NMSS, Non-Motor Symptoms Scale; NPI, Neuropsychiatric Inventory; PD-CRS, Parkinson’s Disease Cognitive Rating Scale; UPDRS, Unified Parkinson’s Disease Rating Scale.

**Supplementary Table 2.** Non-motor symptoms and quality of life in PD patients with and without acute hospitalization during the year after the baseline visit (n=605).

|                              | All sample<br>(N=605) | Without acute<br>hospitalization<br>(N=570) | With acute<br>hospitalization<br>(N=35) | p                 |
|------------------------------|-----------------------|---------------------------------------------|-----------------------------------------|-------------------|
| <b>NMSS total score</b>      | 44.8 ± 36.7           | 41.9 ± 35                                   | 66.1 ± 42.8                             | <b>&lt;0.0001</b> |
| - Cardiovascular             | 5.8 ± 10.3            | 5.7 ± 10.2                                  | 7.3 ± 12.3                              | 0.892             |
| - Sleep / fatigue            | 16.5 ± 16.2           | 16 ± 16.1                                   | 23.9 ± 17.1                             | <b>0.003</b>      |
| - Mood / apathy              | 11.5 ± 16.2           | 11 ± 15.9                                   | 19.1 ± 18.8                             | <b>0.003</b>      |
| - Perceptual symptoms        | 3.2 ± 9               | 2.9 ± 8.7                                   | 7.8 ± 12.9                              | <b>0.001</b>      |
| - Attention / memory         | 9.8 ± 13.9            | 9.4 ± 13.8                                  | 15.9 ± 16.2                             | <b>0.001</b>      |
| - Gastrointestinal symptoms  | 9.6 ± 13.1            | 9.3 ± 12.9                                  | 14.4 ± 15.2                             | <b>0.041</b>      |
| - Urinary symptoms           | 21.7 ± 22.4           | 21.4 ± 22.5                                 | 27.1 ± 20.6                             | <b>0.040</b>      |
| - Sexual dysfunction         | 19.2 ± 26             | 18.9 ± 25.9                                 | 24.4 ± 27.1                             | 0.152             |
| - Miscellaneous              | 15.2 ± 15.6           | 14.9 ± 15.4                                 | 19.9 ± 17.7                             | 0.106             |
| <b>PDQ-39SI</b>              | 17.2 ± 14.1           | 15.9 ± 13.3                                 | 26.6 ± 16                               | <b>&lt;0.0001</b> |
| - Mobility                   | 16.8 ± 19.5           | 16.2 ± 19.1                                 | 27.5 ± 23.2                             | <b>0.001</b>      |
| - Activities of daily living | 18.4 ± 18.9           | 17.5 ± 17.8                                 | 31.8 ± 27.9                             | <b>0.002</b>      |
| - Emotional well-being       | 21.6 ± 20.1           | 20.9 ± 19.9                                 | 31.9 ± 21.5                             | <b>0.002</b>      |
| - Stigma                     | 13.8 ± 20             | 13.5 ± 19.9                                 | 18.2 ± 21.1                             | 0.153             |
| - Social support             | 8.3 ± 16.6            | 7.9 ± 16.3                                  | 12.9 ± 21.1                             | 0.259             |
| - Cognition                  | 19.2 ± 17.8           | 18.6 ± 17.5                                 | 28.9 ± 19.6                             | <b>0.001</b>      |
| - Communication              | 10.2 ± 15.3           | 9.7 ± 19                                    | 19 ± 16.9                               | <b>&lt;0.0001</b> |
| - Pain and discomfort        | 27.1 ± 23.1           | 26.8 ± 23.1                                 | 32.1 ± 23.3                             | 0.133             |

The results represent mean ± SD. Mann-Whitney-Wilcoxon test were applied for comparisons between Non acute hospitalization (N=570) and Acute unplanned Hospitalization (N=35) patients. NMSS, Non-Motor Symptoms Scale; PDQ-39SI, 39-item Parkinson's Disease Quality of Life Questionnaire Summary Index.
